# Supplementary material
Source: PubMed Central journal article supplement (PMC4570860)

## Supplementary Online Content

Sutphen CL, Jasielc MS, Shah AR, et al. Longitudinal cerebrospinal fluid biomarker changes in preclinical Alzheimer disease during middle age. *JAMA Neurol*. Published online July 6, 2015. doi:10.1001/jamaneurol.2015.1285.

**eTable.** Assay performance and specifications as provided by the vendors.

### eReferences

**eFigure 1.** Group longitudinal change over spaghetti plots of EUROIMMUN CSF biomarkers during middle-age.

**eFigure 2.** Longitudinal biomarker trajectories in individuals with different *APOE* genotypes.

This supplementary material has been provided by the authors to give readers additional information about their work.

**eTable.** Assay performance and specifications as provided by the vendors.

| Vendor                                                                           | Fujirebio (formerly Innogenetics) |                                |                                |                                 | EUROIMMUN                     |                                |                                 | QUIDEL                                | SINGULEX                           |
|----------------------------------------------------------------------------------|-----------------------------------|--------------------------------|--------------------------------|---------------------------------|-------------------------------|--------------------------------|---------------------------------|---------------------------------------|------------------------------------|
| Analyte                                                                          | Aβ1-40                            | Aβ1-42                         | Total tau                      | Ptau181                         | Aβ1-40                        | Aβ1-42                         | Total tau                       | YKL-40                                | VILIP-1                            |
| Technology                                                                       | ELISA<br>Colorimetric             | ELISA<br>Colorimetric          | ELISA<br>Colorimetric          | ELISA<br>Colorimetric           | ELISA<br>Colorimetric         | ELISA<br>Colorimetric          | ELISA<br>Colorimetric           | ELISA<br>Colorimetric                 | Single Molecule<br>Counting (SMC™) |
| Fluid Sample                                                                     | CSF                               | CSF                            | CSF                            | CSF                             | CSF                           | CSF                            | CSF                             | CSF                                   | CSF                                |
| Capture Antibody                                                                 | 2G3                               | 21F12                          | AT120                          | HT7                             | 2G3                           | 21F12                          | ADx 201                         | Not Available                         | 3A8.1                              |
| Capture Antibody Epitope                                                         | 35-40                             | 37-42                          | 218-224                        | 159-163                         | Aβx-40                        | Aβx-42                         | Proline-rich region             | Not Available                         | Not Available                      |
| Detection Antibody                                                               | 3D6                               | 3D6                            | HT7/BT2                        | AT270                           | 3D6                           | 3D6                            | ADx 215                         | Not Available                         | Sheep 22                           |
| Detection Antibody Epitope                                                       | 1-5                               | 1-5                            | 159-163/193-198                | 176-182                         | Aβ1-x                         | Aβ1-x                          | N-terminus                      | Not Available                         | Multiple                           |
| Calibrator Concentration Range,<br>pg/mL (not specific, for this study)          | 7.8 - 1000<br>(n=8)               | 62.5 - 4000<br>(n=6)           | 50 - 2500<br>(n=6)             | 15.6 - 1000<br>(n=6)            | 54 - 711<br>(n=6)             | 83 - 1236<br>(n=6)             | 30 - 1050<br>(n=6)              | 20 - 300<br>(n=6)                     | 3.9 - 3000<br>(n=10)               |
| Limit of Detection (LOD), pg/mL,<br>(range), number of runs                      | 3.3<br>(0.7 - 4.2)<br>4 runs      | 65<br>(52-87)<br>7 runs        | 34<br>(25-47)<br>8 runs        | 13.4<br>(11.4 - 14.9)<br>4 runs | 70<br>(58 - 85)<br>6 runs     | 7.5<br>(6.3 - 9.0)<br>6 runs   | 44.2<br>(41.1 - 46.8)<br>4 runs | 5.4<br>Not available<br>Not available | 1.4<br>(0.077-6.9)<br>16 runs      |
| Sample Specifications                                                            |                                   |                                |                                |                                 |                               |                                |                                 |                                       |                                    |
| Sample Pre-dilution                                                              | 1:100                             | No                             | No                             | No                              | 1:21                          | No                             | No                              | 1:03                                  | No                                 |
| Volume Sample Per Well (μL)                                                      | 75                                | 25                             | 25                             | 75                              | 15                            | 15                             | 25                              | 20                                    | 15                                 |
| Total Well Volume                                                                | 100                               | 100                            | 100                            | 100                             | 115                           | 115                            | 125                             | 120                                   | 200                                |
| Number of Replicate Wells                                                        | 2                                 | 2                              | 2                              | 2                               | 2                             | 2                              | 2                               | 2                                     | 2                                  |
| Sample Incubation                                                                |                                   |                                |                                |                                 |                               |                                |                                 |                                       |                                    |
| Time, hrs                                                                        | 14-18                             | 1                              | 14-18                          | 14-18                           | 3                             | 3                              | 3                               | 1                                     | 2                                  |
| Temperature                                                                      | 2-8°C                             | 23-27°C                        | 23-27°C                        | 2-8°C                           | 23-27°C                       | 23-27°C                        | 23-27°C                         | 23-27°C                               | 23-27°C                            |
| Reported Intra-Assay Variability <sup>1</sup> ,<br>% CV, (range), number of runs | 2.8<br>(0.3 - 7.8)<br>5 runs      | 4.6<br>(0.8 - 11.0)<br>3 runs  | 3.2<br>(0.0 - 13.2)<br>2 runs  | 1.7<br>(0.0 - 8.9)<br>4 runs    | 2.7<br>(2.4 - 3.1)<br>3 runs  | 3.9<br>(2.3 - 6.2)<br>3 runs   | 5.0<br>(3.9 - 6.5)<br>4 runs    | 6<br>(5.6 - 6.6)<br>Not available     | 4.4<br>(3.1 - 7.0)<br>10 runs      |
| Reported Inter-Assay Variability <sup>1</sup> ,<br>%CV, (range), number of runs  | 4.4<br>(3.2 - 5.8)<br>4 runs      | 7.8<br>(1.4 - 18.0)<br>3 runs  | 11.5<br>(3.8 - 42.8)<br>2 runs | 11.4<br>(6.6 - 19.2)<br>4 runs  | 8.3<br>(7.3 - 9.3)<br>5 runs  | 5.6<br>(4.4 - 7.6)<br>7 runs   | 7.4<br>(6.1 - 9.3)<br>5 runs    | 6.7<br>(6.0 - 7.0)<br>Not available   | 6.2<br>(5.0 - 7.0)<br>1 run        |
| Study Intra-Assay Variability <sup>2</sup> ,<br>% CV, (range), number of runs    | 2.7<br>(0.4 - 12.7)<br>12 runs    | 4.4<br>(0.2 - 13.7)<br>12 runs | 2.0<br>(0.0 - 11.4)<br>12 runs | 1.0<br>(0.1 - 4.6)<br>12 runs   | 2.3<br>(0.1 - 6.0)<br>12 runs | 3.0<br>(0.1 - 9.7)<br>12 runs  | 5.42<br>(0.8 - 22.9)<br>12 runs | 1.9<br>(0.1 - 6.4)<br>12 runs         | 4.5<br>(0.0 - 20.8)<br>16 runs     |
| Study Inter-Assay Variability <sup>2</sup> ,<br>%CV, (range), number of runs     | 3.8<br>(0.0 - 24.6)<br>12 runs    | 4.3<br>(0.0 - 20.6)<br>12 runs | 2.1<br>(0.0 - 14.8)<br>12 runs | 2.2<br>(0.0 - 17.5)<br>12 runs  | 14<br>(0.1 - 13.7)<br>12 runs | 4.1<br>(0.0 - 16.7)<br>12 runs | 4.1<br>(0.0 - 24.2)<br>12 runs  | 3.7<br>(0.0 - 21.6)<br>12 runs        | 4.3<br>(0.0 - 24.8)<br>12 runs     |

Samples were analyzed for Aβ1-40, Aβ1-42, total tau, and phosphorylated-tau181 (ptau181) using the “Improved” INNOTEST™ ELISA (Fujirebio Europe [formerly Innogenetics], Gent, Belgium). Compared to the previous version of the INNOTEST™ assays, these improved assays each contain a set of ready-to-use calibrator series, run validation control samples (= calibrator in buffer), and harmonized buffer reagents. For comparison purposes, concentrations of Aβ1-40, Aβ1-42 and total tau were also measured using EUROIMMUN ELISAs (EUROIMMUN, Luebeck, Germany). The EUROIMMUN assays are considered second generation assays since they do not possess matrix interference (i.e., they exhibit good dilutional linearity). For Aβ species, both assays utilize the same monoclonal antibodies, but they are obtained from a different process of culture, production, and purification. In addition, the amount of CSF included in the wells for testing is lower in the EUROIMMUN assays, as such reducing the probable issues with matrix interference<sup>1,2</sup>. So in principle, the EUROIMMUN assay measures another fraction of the free, non-protein bound analyte, in a sample. YKL-40 (also known as chitinase-3 like 1), an astrocyte-derived marker of gliosis/neuroinflammation, was measured with the MicroVue ELISA (Quidel, San Diego, CA), as described previously<sup>3</sup>. Visinin-like protein 1 (VILIP-1), a marker of neuronal injury, was measured using a two-site immunoassay implemented via a microparticle-based Erenna immunoassay system (Singulex, Alameda, CA) as described previously<sup>4</sup>. All ELISA kits passed in-house quality control measures including: 1) standard curve values having a CV <25% and no more than two standards either oversaturating or undersaturating using a Synergy 2 Multi-Mode Reader (Bio-Tek Instruments, Inc.), 2) no more than one provided kit control and one internal pooled CSF control failing due to reading outside the provided range or having a CV >25% with the exception of one assay in which both internal CSF controls failed due to high CV – in this case, both kit controls passed, and 3) samples failed if there was a CV >25%. The Singulex kits passed in-house quality control measures including: 1) standard curves were assessed according to software provided by Singulex, 2) no more than 2 of 3 internal pooled CSF

controls falling outside the range determined by all previous runs using the same lot number of kits and 3) samples failed if there was a CV >25%. <sup>1</sup> performance characteristics as provided by the vendor. <sup>2</sup> actual performance characteristics in the current study.

## eReferences

1. Bjerke M, Portelius E, Minthon L, et al. Confounding factors influencing amyloid Beta concentration in cerebrospinal fluid. *Int J Alzheimers Dis.* 2010;2010.
2. Cullen VC, Fredenburg RA, Evans C, Conliffe PR, Solomon ME. Development and advanced validation of an optimized method for the quantitation of Abeta42 in human cerebrospinal fluid. *AAPS J.* Sep 2012;14(3):510-8.
3. Craig-Schapiro R, Perrin RJ, Roe CM, et al. YKL-40: a novel prognostic fluid biomarker for preclinical Alzheimer's disease. *Biol Psychiatry.* Nov 15 2010;68(10):903-12.
4. Tarawneh R, D'Angelo G, Macy E, et al. Visinin-like protein-1: diagnostic and prognostic biomarker in Alzheimer disease. *Ann Neurol.* Aug 2011;70(2):274-85.

**eFigure 1.** Group longitudinal change over spaghetti plots of EUROIMMUN CSF biomarkers during middle-age. Estimated slopes and within-person patterns for A) A $\beta$ 40, B) A $\beta$ 42, C) the A $\beta$ 42/A $\beta$ 40 ratio, D) tau, and E) tau/A $\beta$ 42 are shown in the three age bins for *APOE*  $\epsilon$ 4-negative (top graph of each panel, n=108 participants) and  $\epsilon$ 4-positive (bottom graph of each panel, n=61 participants) groups. Annual slopes have been extrapolated to 9 years, and each slope begins at the mean baseline biomarker value of each age bin. Blue, EARLY middle-age (45-54 years at baseline); Black, MID middle-age (55-64 years at baseline); Red, LATE middle-age (65-74 years at baseline). \* slopes significantly different from 0 ( $p < 0.05$ ). ‡, slopes significantly different between *APOE*  $\epsilon$ 4 groups within a given age group ( $p < 0.05$ ). Trend,  $p = 0.051$ -0.06.

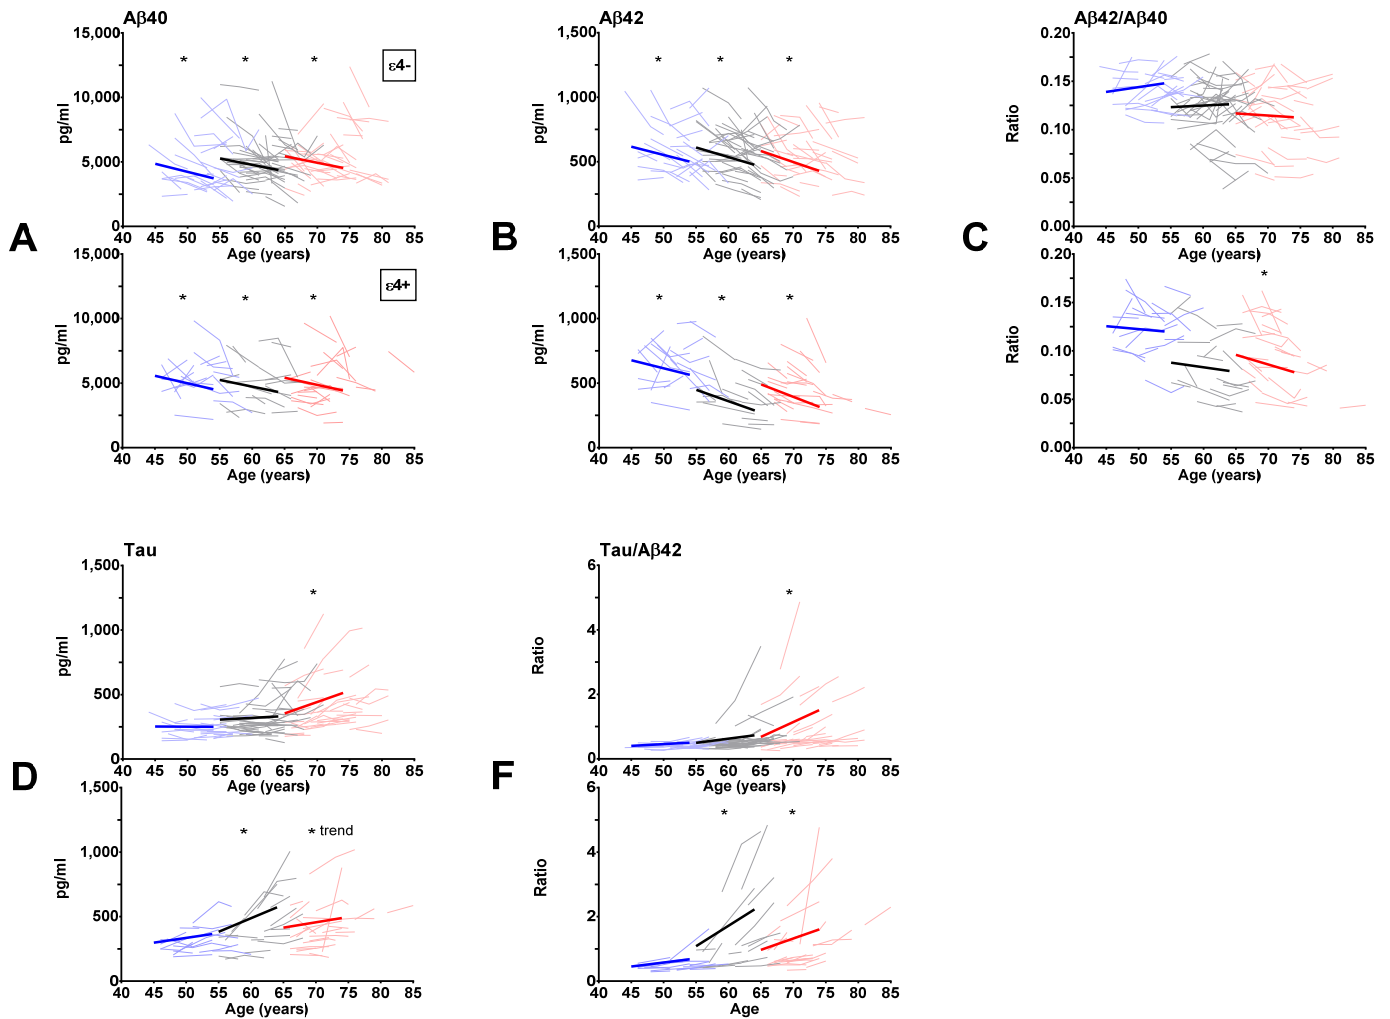

**eFigure 2.** Longitudinal biomarker trajectories in individuals with different *APOE* genotypes. Within-person trajectories of CSF A) A $\beta$ 40, B) A $\beta$ 42, C) tau, D) the tau/A $\beta$ 42 ratio, E) VILIP-1, and F) YKL-40 are plotted as a function of age. A $\beta$ 40, A $\beta$ 42 and tau were measured with the INNOTEST assay. Colors identify *APOE* genotype: no  $\epsilon$ 4 alleles (gray,  $\epsilon$ 4 $^{-/-}$ ;  $\epsilon$ 2/ $\epsilon$ 2,  $\epsilon$ 2/ $\epsilon$ 3,  $\epsilon$ 3/ $\epsilon$ 3), one  $\epsilon$ 4 allele (purple,  $\epsilon$ 4 $^{+/-}$ ;  $\epsilon$ 2/ $\epsilon$ 4,  $\epsilon$ 3/ $\epsilon$ 4) and two  $\epsilon$ 4 alleles (orange,  $\epsilon$ 4 $^{+/+}$ ;  $\epsilon$ 4/ $\epsilon$ 4).

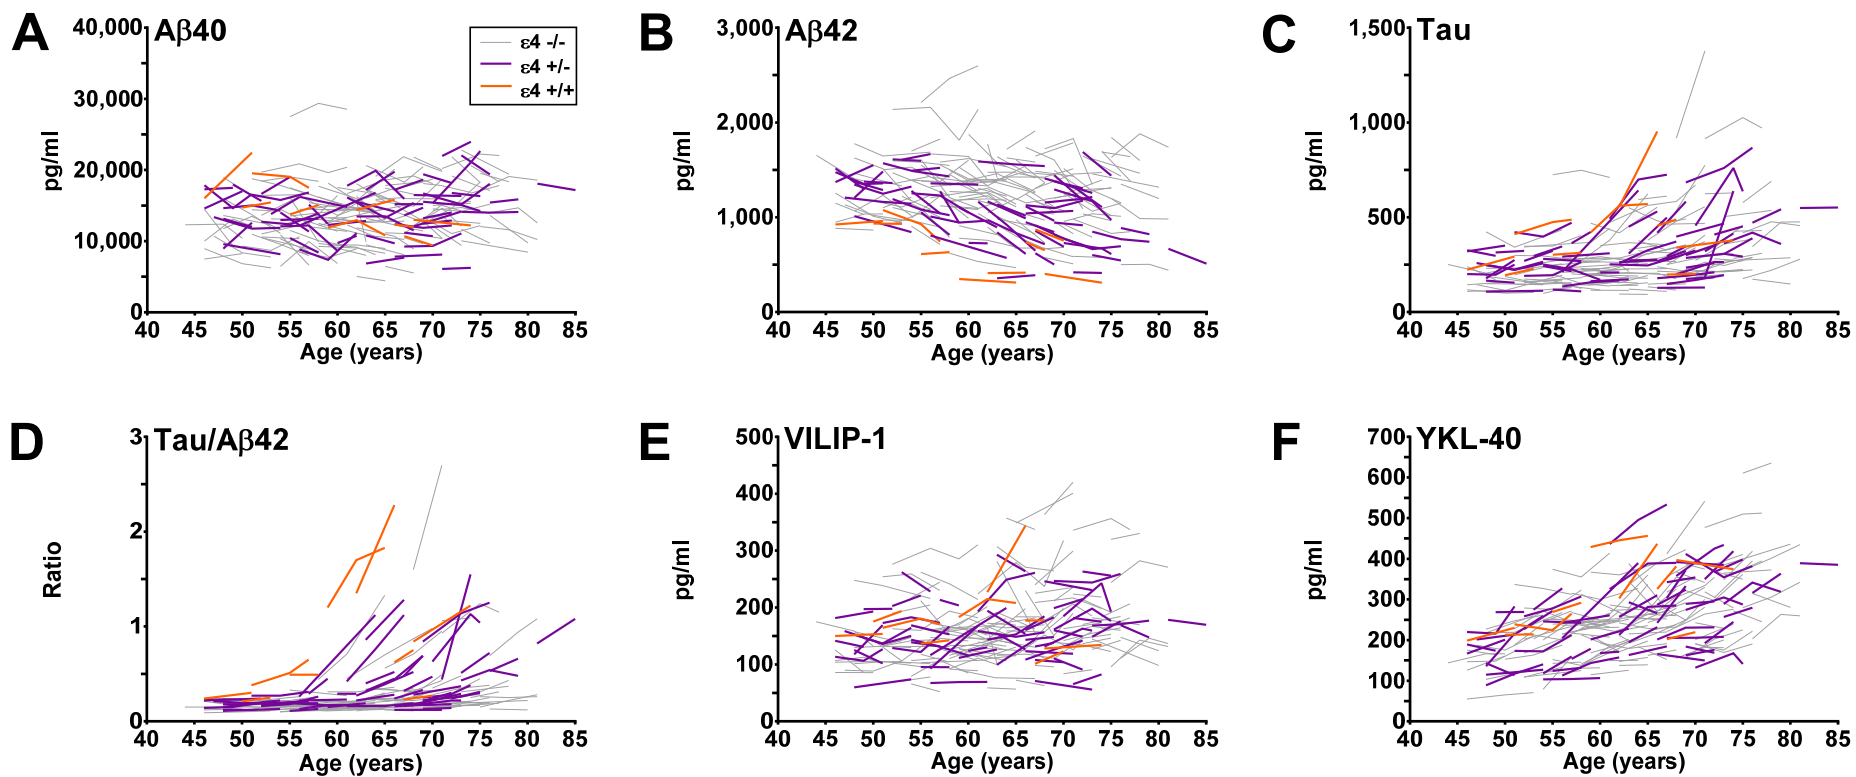

Supplement: NIHMS712976-supplement-Suppl_JAMA_neuro.pdf [file NIHMS712976-supplement-Suppl_JAMA_neuro.pdf]
